# Supplementary material for: Hydrochlorination of acetylene catalyzed by an activated carbon supported chlorotriphenylphosphine gold complex
Source: Royal Society of Chemistry journal article supplement (doi:10.1039/c6cy01241h), 2016-01-01
Supplement: c6cy01241h1.pdf [file c6cy01241h1.pdf]

1  
2  
3  
4  
5  
6  
7  
8  
9  
10  
11  
12  
13  
14  
15  
16  
17  
18  
19  
20  
21  
22  
23

## Supporting information

### Hydrochlorination of Acetylene catalyzed by activated carbon supported chlorotriphenylphosphine gold complex

Yanzhao Dong, Wei Li, Ze Yan, Jinli Zhang (\*)

*School of Chemical Engineering & Technology, Tianjin University, Tianjin 300350,*

*P.R. China.*

Corresponding authors: Email address: [zhangjinli@tju.edu.cn](mailto:zhangjinli@tju.edu.cn)

Fax: +86-22-27890643; Tel: +86-22-27890643

1 **Table S1** Mass loss of fresh and used AuCl<sub>3</sub>/AC and AuPPh<sub>3</sub>Cl/AC catalysts under different  
2 temperature ranges.

| Temperature/ °C                                           | < 150 | 150-470 |
|-----------------------------------------------------------|-------|---------|
| Mass loss of AuCl <sub>3</sub> /AC-fresh catalyst, (%)    | 0.5   | 2.8     |
| Mass loss of AuCl <sub>3</sub> /AC-used catalyst, (%)     | 0.5   | 5.4     |
| Mass loss of AuPPh <sub>3</sub> Cl/AC-fresh catalyst, (%) | 0.5   | 3.3     |
| Mass loss of AuPPh <sub>3</sub> Cl/AC-used catalyst, (%)  | 0.5   | 5.1     |

3

#### 4 **The calculation of coking deposition**

5 Take AuCl<sub>3</sub>/AC catalyst for instance:

6 The fresh AuCl<sub>3</sub>/AC catalyst shows a mass loss of 2.8% in the 150-470 °C range, indicating a  
7 mass loss of 2.8 g per 100 g of AuCl<sub>3</sub>/AC sample; while for the used AuCl<sub>3</sub>/AC catalyst, the mass  
8 loss in the same range is 5.4%, indicating a mass loss of 5.4 g per 100 g of (AuCl<sub>3</sub>/AC catalyst +  
9 coke). Assuming that the coke deposition amount on the used AuCl<sub>3</sub>/AC catalyst equals X, the  
10 following equations should be satisfied,  $100/2.8=(100-X)/Y$ , and  $Y+X=5.4$ .

11 Then, the value of X is solved to be 2.7.

12 Thereby, the coking deposition amount on the surface of the used AuCl<sub>3</sub>/AC catalyst is 2.7%.

13

14

15

16

17

1 **Table S2** Size of Au particles in Au-based catalysts, determined by XRD <sup>a</sup>.

| Catalyst                 | Au particles size (nm) |                 |
|--------------------------|------------------------|-----------------|
|                          | Fresh                  | Used            |
| AuCl <sub>3</sub> /AC    | <4 <sup>b</sup>        | 19.9 ± 3        |
| AuPPh <sub>3</sub> Cl/AC | <4 <sup>b</sup>        | <4 <sup>b</sup> |

<sup>a</sup> Error estimated from XRD peak broadening of 0.06 ° at the Au (111) reflection at 38.14 ° (2θ).

<sup>b</sup> It was impossible to assign any error band below 4 nm, as this size is below the XRD method.

2  
3  
4  
5  
6

7 **Table S3** Desorption amount of C<sub>2</sub>H<sub>2</sub>, HCl and C<sub>2</sub>H<sub>3</sub>Cl on the fresh catalysts

| Catalyst                 | Desorption area<br>of HCl | Desorption area<br>of C <sub>2</sub> H <sub>2</sub> | Desorption area<br>of C <sub>2</sub> H <sub>3</sub> Cl |
|--------------------------|---------------------------|-----------------------------------------------------|--------------------------------------------------------|
| AuCl <sub>3</sub> /AC    | 2422                      | 1968                                                | 2473                                                   |
| AuPPh <sub>3</sub> Cl/AC | 3568                      | 1273                                                | 1308                                                   |

8  
9  
10  
11  
12  
13  
14  
15  
16  
17  
18  
19

1 **Table S4** The catalytic performance of some potential Au-based catalysts recently reported in the literatures.

|                                                                                 | Composition of catalyst                                                                                        | Reaction conditions                                                                                                                                                     | Initial catalytic activity                      | During the time period (h) | Deactivation rate (% h <sup>-1</sup> ) |
|---------------------------------------------------------------------------------|----------------------------------------------------------------------------------------------------------------|-------------------------------------------------------------------------------------------------------------------------------------------------------------------------|-------------------------------------------------|----------------------------|----------------------------------------|
| AuPPh <sub>3</sub> Cl/AC <sup>[this work]</sup>                                 | 0.521 wt% Au, TPP                                                                                              | T=170°C, GHSV(C <sub>2</sub> H <sub>2</sub> )=360 h <sup>-1</sup> ,<br>V <sub>HCl</sub> /V <sub>C<sub>2</sub>H<sub>2</sub></sub> =1.1                                   | X <sub>A</sub> =96.3%, S <sub>VCM</sub> =99.9%  | 200                        | 0.055                                  |
| Na <sub>3</sub> Au(S <sub>2</sub> O <sub>3</sub> ) <sub>2</sub> /C <sup>1</sup> | 0.15 wt% Au                                                                                                    | T=180°C, GHSV(C <sub>2</sub> H <sub>2</sub> )=227 h <sup>-1</sup><br>V <sub>HCl</sub> /V <sub>C<sub>2</sub>H<sub>2</sub></sub> =1.2                                     | X <sub>A</sub> = 90%, S <sub>VCM</sub> > 99.0%  | 150                        | 0.067                                  |
| Catal. ACS <sup>2</sup>                                                         | 0.25 wt% Au, 1.62 wt% Cu,<br>2.46 wt% KSCN                                                                     | T=180°C, GHSV(C <sub>2</sub> H <sub>2</sub> )=360 h <sup>-1</sup><br>V <sub>HCl</sub> /V <sub>C<sub>2</sub>H<sub>2</sub></sub> /V <sub>N<sub>2</sub></sub> =1.1/1/0.083 | X <sub>A</sub> = 98%, S <sub>VCM</sub> > 99.0%  | 10                         | 0.048                                  |
| [AuCl <sub>2</sub> (phen)]Cl/AC <sup>3</sup>                                    | 0.49 wt% Au, [AuCl <sub>2</sub> (phen)]Cl<br>1,10-phenanthroline                                               | T=180°C, GHSV(C <sub>2</sub> H <sub>2</sub> )=280 h <sup>-1</sup><br>V <sub>HCl</sub> /V <sub>C<sub>2</sub>H<sub>2</sub></sub> = 1.2                                    | X <sub>A</sub> =96%, S <sub>VCM</sub> > 99.5%   | 40                         | 0.075                                  |
| Au/Cu/TCCA <sup>4</sup>                                                         | 0.2 wt% Au, TCCA, CuCl <sub>2</sub><br>n(Au)/n(Cu)/n(TCCA)=1/5/20                                              | T=180°C, GHSV(C <sub>2</sub> H <sub>2</sub> )=90 h <sup>-1</sup><br>V <sub>HCl</sub> /V <sub>C<sub>2</sub>H<sub>2</sub></sub> = 1.2                                     | X <sub>A</sub> =98%                             | 12                         | 0.023                                  |
| AuCl <sub>3</sub> -thiourea/AC <sup>5</sup>                                     | 0.4 wt% Au, 0.75% thiourea                                                                                     | T=170 °C, GHSV(C <sub>2</sub> H <sub>2</sub> )=870h <sup>-1</sup><br>V <sub>HCl</sub> /V <sub>C<sub>2</sub>H<sub>2</sub></sub> =1.15                                    | X <sub>A</sub> =78.67%, S <sub>VCM</sub> >99.9% | 20                         | 0.409                                  |
| Au1La3/SAC <sup>6</sup>                                                         | 1 wt% Au, LaCl <sub>3</sub><br>n(La)/n(Au)=3                                                                   | T=150°C, GHSV(C <sub>2</sub> H <sub>2</sub> )=360 h <sup>-1</sup><br>V <sub>HCl</sub> /V <sub>C<sub>2</sub>H<sub>2</sub></sub> =1.15                                    | X <sub>A</sub> =100%, S <sub>VCM</sub> =99.9%   | 48                         | 0.208                                  |
| Au1Co(III)3/SAC <sup>7</sup>                                                    | 1 wt% Au, Co(NH <sub>3</sub> ) <sub>6</sub> Cl <sub>3</sub><br>n(Co)/n(Au)=3                                   | T=150°C, GHSV(C <sub>2</sub> H <sub>2</sub> )=360 h <sup>-1</sup><br>V <sub>HCl</sub> /V <sub>C<sub>2</sub>H<sub>2</sub></sub> =1.15                                    | X <sub>A</sub> =99.9%, S <sub>VCM</sub> =99.9%  | 48                         | 0.165                                  |
| Au1Ba(II)1/AC <sup>8</sup>                                                      | 1 wt% Au, BaCl <sub>2</sub><br>n(Ba)/n(Au)=1                                                                   | T=200°C, GHSV(C <sub>2</sub> H <sub>2</sub> )=360 h <sup>-1</sup><br>V <sub>HCl</sub> /V <sub>C<sub>2</sub>H<sub>2</sub></sub> =1.15                                    | X <sub>A</sub> =97.2%, S <sub>VCM</sub> >99.0%  | 86                         | 0.057                                  |
| 1Au1In4Cs/AC <sup>9</sup>                                                       | 1.0 wt% Au, CsCl, InCl <sub>3</sub><br>4.0 wt% Cs, 1 wt% In                                                    | T=180°C, GHSV(C <sub>2</sub> H <sub>2</sub> )=1480h <sup>-1</sup><br>V <sub>HCl</sub> /V <sub>C<sub>2</sub>H<sub>2</sub></sub> =1.2                                     | X <sub>A</sub> =92.8%, S <sub>VCM</sub> >99.9%  | 50                         | 0.130                                  |
| Au1Co3Cu1/SAC <sup>10</sup>                                                     | 0.919 wt% Au, Co(NH <sub>3</sub> ) <sub>6</sub> Cl <sub>3</sub> , CuCl <sub>2</sub><br>n(Co)/n(Cu)/n(Au)=3/1/1 | T=150°C, GHSV(C <sub>2</sub> H <sub>2</sub> )=720 h <sup>-1</sup><br>V <sub>HCl</sub> /V <sub>C<sub>2</sub>H<sub>2</sub></sub> =1.15                                    | X <sub>A</sub> =99.0%, S <sub>VCM</sub> =99.9%  | 270                        | 0.189                                  |
| Au/20%P-SAC-700 <sup>11</sup>                                                   | 1.16 wt% Au, TPP (carrier)                                                                                     | T=170°C, GHSV(C <sub>2</sub> H <sub>2</sub> )=360 h <sup>-1</sup>                                                                                                       | X <sub>A</sub> =99.9%, S <sub>VCM</sub> =100%   | 45                         | 0.064                                  |

|                                             |                                                                     |                                                                                                                            |                     |     |       |
|---------------------------------------------|---------------------------------------------------------------------|----------------------------------------------------------------------------------------------------------------------------|---------------------|-----|-------|
| AuCl <sub>3</sub> /5PPy-MWCNT <sup>12</sup> | -dopant), 20 wt% TPP<br>1.27wt% Au, Polypyrrole<br>(carrier-dopant) | $V_{HCl}/V_{C_2H_2}=1.1$<br>T=180°C, GHSV(C <sub>2</sub> H <sub>2</sub> )=100 h <sup>-1</sup><br>$V_{HCl}/V_{C_2H_2}=1.15$ | X <sub>A</sub> =93% | 100 | 0.103 |
|---------------------------------------------|---------------------------------------------------------------------|----------------------------------------------------------------------------------------------------------------------------|---------------------|-----|-------|

1

2 <sup>a</sup> X<sub>A</sub> represents the initial conversion of acetylene and S<sub>VCM</sub> represents the initial selectivity to VCM of the catalyst.

3 <sup>b</sup> Deactivation rate was defined as (the initial maximum C<sub>2</sub>H<sub>2</sub> conversion – the final C<sub>2</sub>H<sub>2</sub> conversion)/(deactivation period, h) <sup>13</sup>

4

1

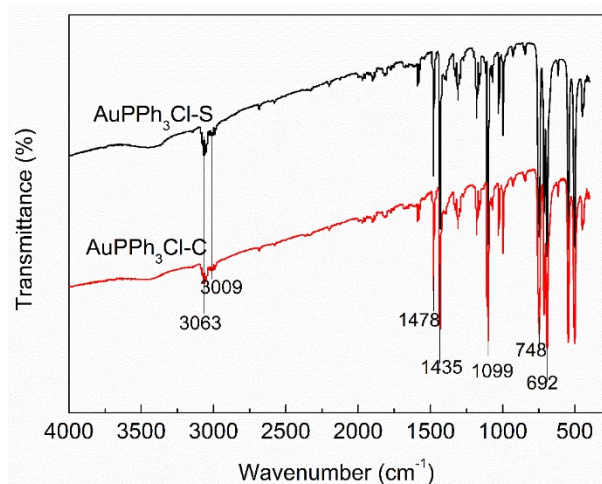

2

3

**Fig. S1** FT-IR spectra of the synthesized AuPPh<sub>3</sub>Cl-S and commercial AuPPh<sub>3</sub>Cl

4

(AuPPh<sub>3</sub>Cl-C)

5

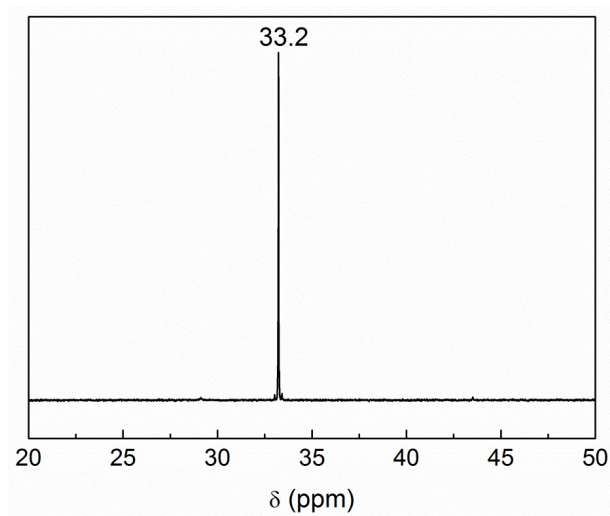

6

7

**Fig. S2** The <sup>31</sup>P NMR spectra of the synthesized AuPPh<sub>3</sub>Cl complex

8

9

10

11

12

13

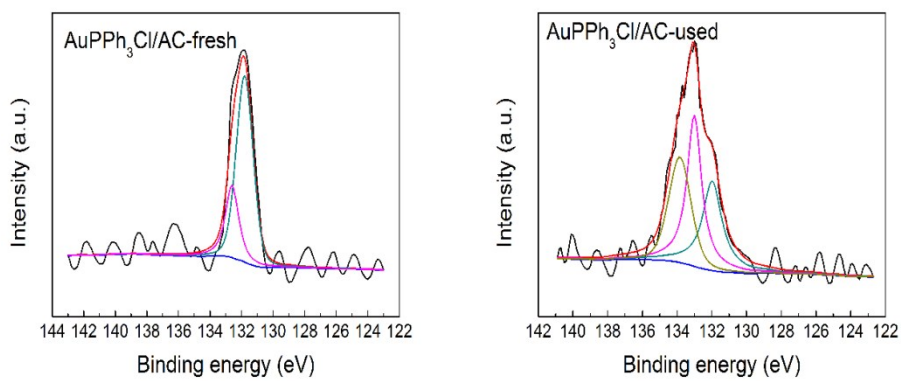

1

2

**Fig. S3** P 2p XPS spectra of the fresh and used AuPP<sub>3</sub>Cl/AC catalyst.

3

4

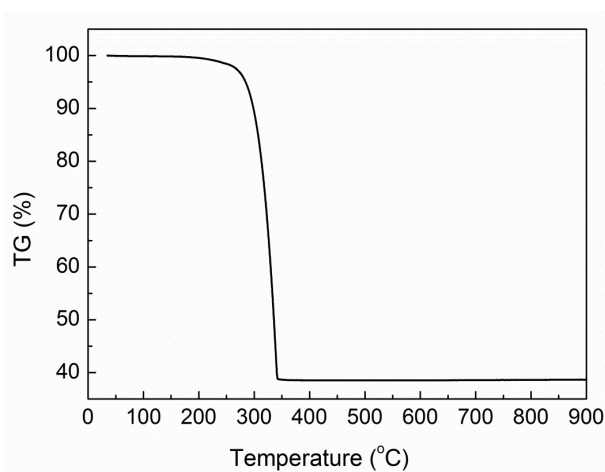

5

6

**Fig. S4** TGA curve of AuPP<sub>3</sub>Cl-S crystal at a heating rate of 10 °C min<sup>-1</sup> under nitrogen

7

atmosphere.

8

9

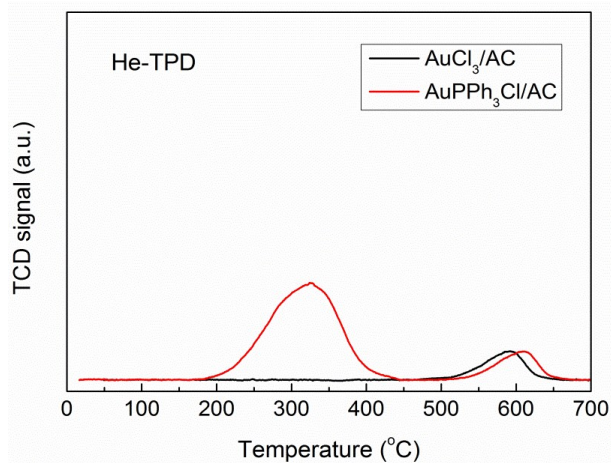

1

2 **Fig. S5** TPD profile of the fresh AuCl<sub>3</sub>/AC and AuPPh<sub>3</sub>Cl/AC catalysts in pure helium

3

atmosphere.

4

5

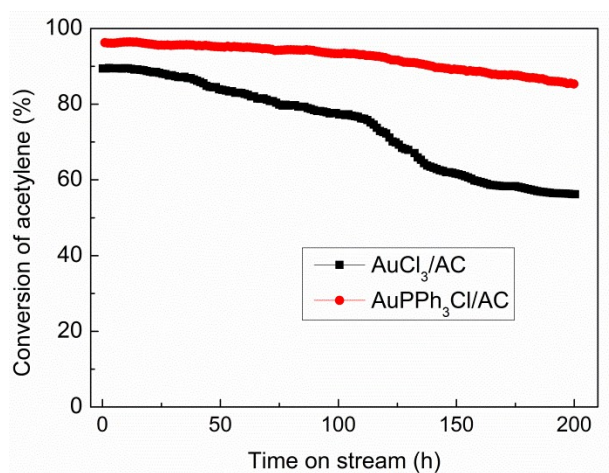

6

7 **Fig. S6** Comparison of stability of AuCl<sub>3</sub>/AC and AuPPh<sub>3</sub>Cl/AC. Reaction condition: temperature

8

(T) = 170 °C, GHSV(C<sub>2</sub>H<sub>2</sub>) = 360 h<sup>-1</sup> and V<sub>HCl</sub>:V<sub>C<sub>2</sub>H<sub>2</sub></sub> = 1.1.

9

## 10 References

- 11 1. P. Johnston, N. Carthey and G. J. Hutchings, *J. Am. Chem. Soc.*, 2015, **137**, 14548-14557.
- 12 2. K. Zhou, J. C. Jia, C. H. Li, H. Xu, J. Zhou, G. H. Luo and F. Wei, *Green Chem.*, 2015, **17**,
- 13 356-364.
- 14 3. C. F. Huang, M. Y. Zhu, L. H. Kang and B. Dai, *Catal. Commun.*, 2014, **54**, 61-65.
- 15 4. H. Xu, K. Zhou, J. Si, C. Li and G. Luo, *Catal. Sci. Technol.*, 2016, **6**, 1357-1366.



- 1 5. X. Yin, C. Huang, L. Kang, M. Zhu and B. Dai, *Catal. Sci. Technol.*, 2016, **6**, 4254-4259.
- 2 6. H. Y. Zhang, B. Dai, X. G. Wang, L. L. Xu and M. Y. Zhu, *J. Ind. Eng. Chem.*, 2012, **18**, 49-  
3 54.
- 4 7. H. Y. Zhang, B. Dai, X. G. Wang, W. Li, Y. Han, J. J. Gu and J. L. Zhang, *Green Chem.*,  
5 2013, **15**, 829-836.
- 6 8. H. Y. Zhang, W. Li, X. Q. Li, W. Zhao, J. J. Gu, X. Y. Qi, Y. Z. Dong, B. Dai and J. L. Zhang,  
7 *Catal. Sci. Technol.*, 2015, **5**, 1870-1877.
- 8 9. J. Zhao, T. Zhang, X. Di, J. Xu, S. Gu, Q. Zhang, J. Ni and X. Li, *Catal. Sci. Technol.*, 2015, **5**,  
9 4973-4984.
- 10 10. H. Y. Zhang, B. Dai, W. Li, X. G. Wang, J. L. Zhang, M. Y. Zhu and J. J. Gu, *J. Catal.*, 2014,  
11 **316**, 141-148.
- 12 11. B. G. Wang, L. Yu, J. L. Zhang, Y. F. Pu, H. Y. Zhang and W. Li, *RSC Adv.*, 2014, **4**, 15877-  
13 15885.
- 14 12. X. Y. Li, M. Y. Zhu and B. Dai, *Appl. Catal., B*, 2013, **142**, 234-240.
- 15 13. H. Zhang, W. Li, Y. Jin, W. Sheng, M. Hu, X. Wang and J. Zhang, *Appl. Catal., B*, 2016, **189**,  
16 56-64.
- 17
- 18
